# Supplementary material for: Chronic Restraint Stress Inhibits the Response to a Second Hit in Adult Male Rats: A Role for BDNF Signaling
Source: PubMed Central journal article supplement (PMC7503736; doi:10.3390/ijms21176261), 2020-08-29

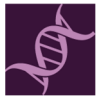

Article

# Chronic Restraint Stress Inhibits the Response to a Second Hit in Adult Male Rats: A Role for BDNF Signaling

Paola Brivio <sup>1</sup>, Giulia Sbrini <sup>1</sup>, Giulia Corsini <sup>1</sup>, Maria Serena Paladini <sup>2</sup>, Giorgio Racagni <sup>1</sup>, Raffaella Molteni <sup>2</sup> and Francesca Calabrese <sup>1,\*</sup>

<sup>1</sup> Department of Pharmacological and Biomolecular Sciences, Università degli Studi di Milano, 20133 Milan, Italy; paola.brivio@unimi.it (P.B.); giulia.sbrini@unimi.it (G.S.); giuliacorsini892@gmail.com (G.C.); giorgio.racagni@unimi.it (G.R.)

<sup>2</sup> Department of Medical Biotechnology and Translational Medicine, Università degli Studi di Milano, 20133 Milan, Italy; maria.paladini@unimi.it (M.S.P.); raffaella.molteni@unimi.it (R.M.)

\* Correspondence: francesca.calabrese@unimi.it

Received: 3 August 2020; Accepted: 26 August 2020; Published: 29 August 2020

## Supplementary figure

**Figure S1.** Analysis of the cognitive performance in chronically stressed (CRS) rats.

The data are the mean  $\pm$  SEM. \* $p < 0.05$  vs No stress (Unpaired T-test).

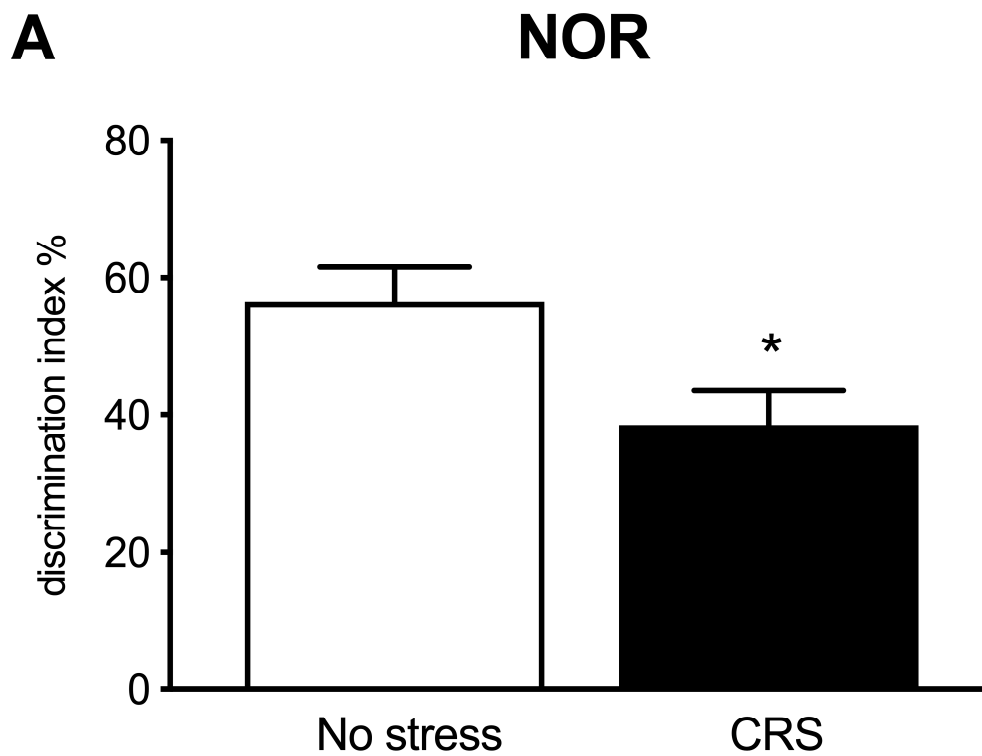

**Figure S2.** Schematic representation of the subregions (Cg1, PrL and IL) of the PFC considered for the molecular analysis (plate 6-10 of Paxinos [42]).

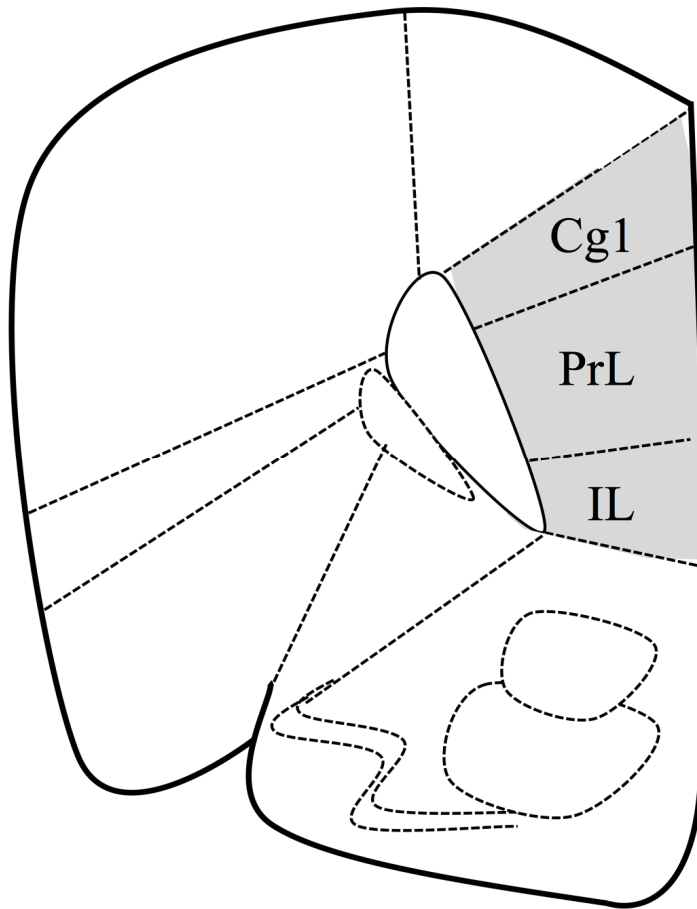

**Figure S3.** Western blots bands and related experimental groups. 1-9: No stress/No ARS; 12-17: No stress/ARS; 61-70: CRS+wash/No ARS; 71-80: CRS+wash/ARS.

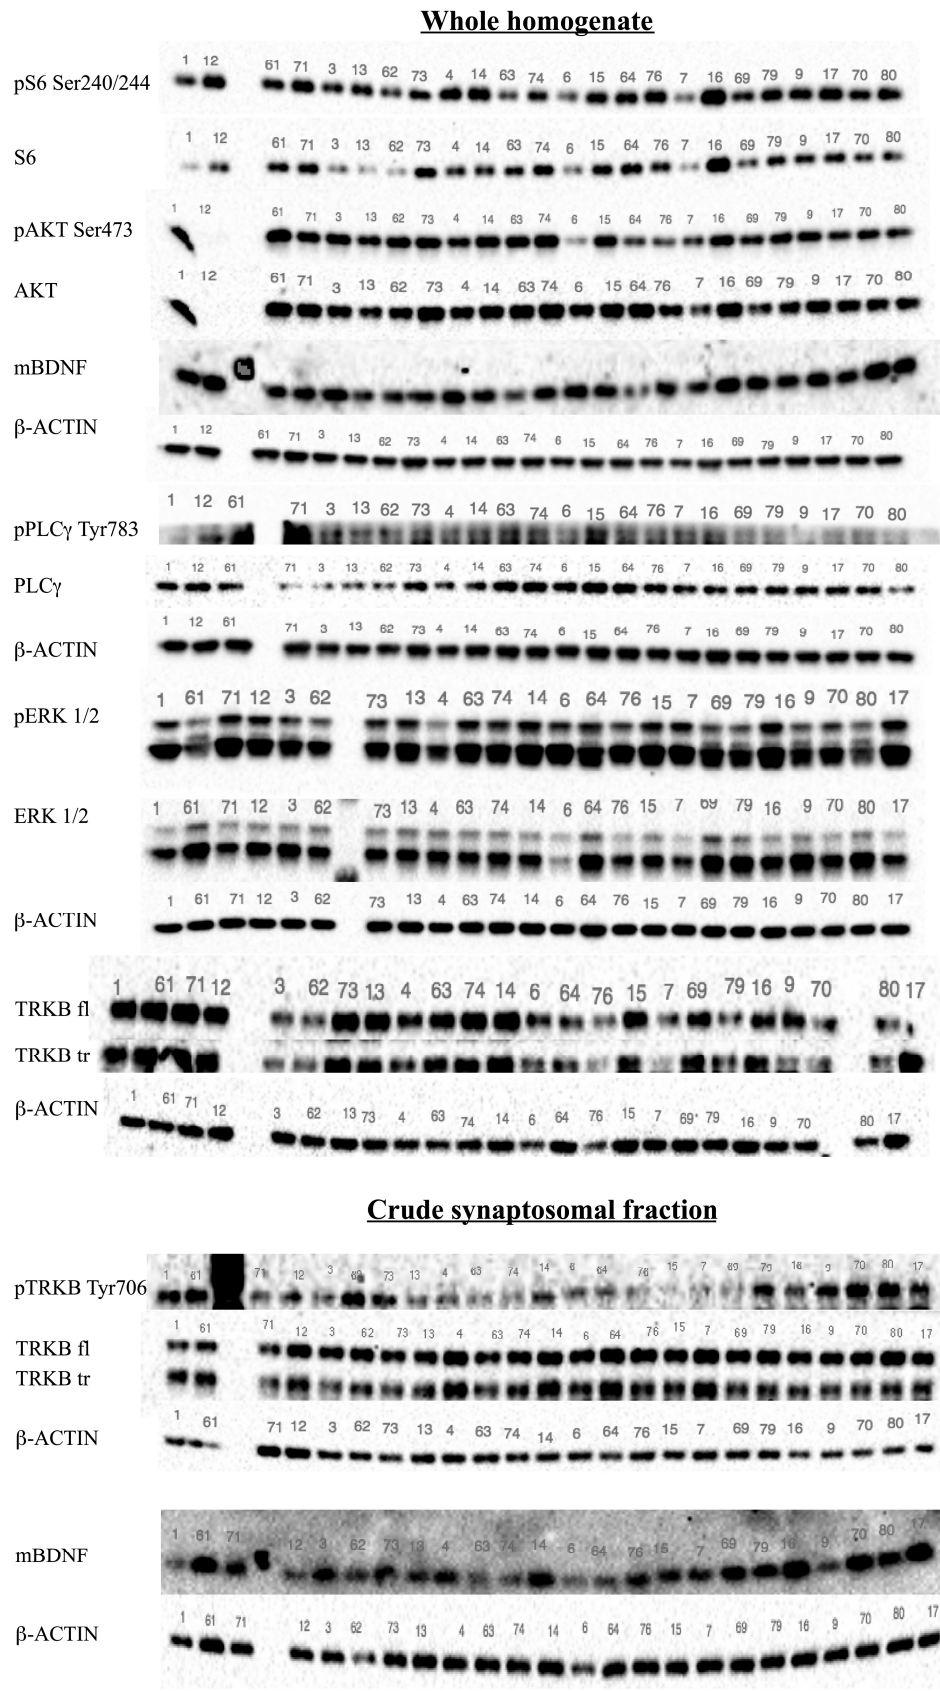

Supplement: ijms-21-06261-s001.pdf [file ijms-21-06261-s001.pdf]
